# Supplementary material for: 3D nanostructured conductive PANI/MXene hydrogels for durable aqueous Zn-ion batteries
Source: Royal Society of Chemistry journal article supplement (doi:10.1039/d3ta05725a), 2023-11-22
Supplement: d3ta05725a1.pdf [file d3ta05725a1.pdf]

## Supporting Information

### **3D Nanostructured Conductive PANI/MXene Hydrogels for Durable Aqueous Zn-ion Batteries**

Yalei Wang,<sup>a,b</sup> Jun Song,<sup>\* b</sup> and Wai-Yeung Wong<sup>\* a,c</sup>

## Supporting Figures

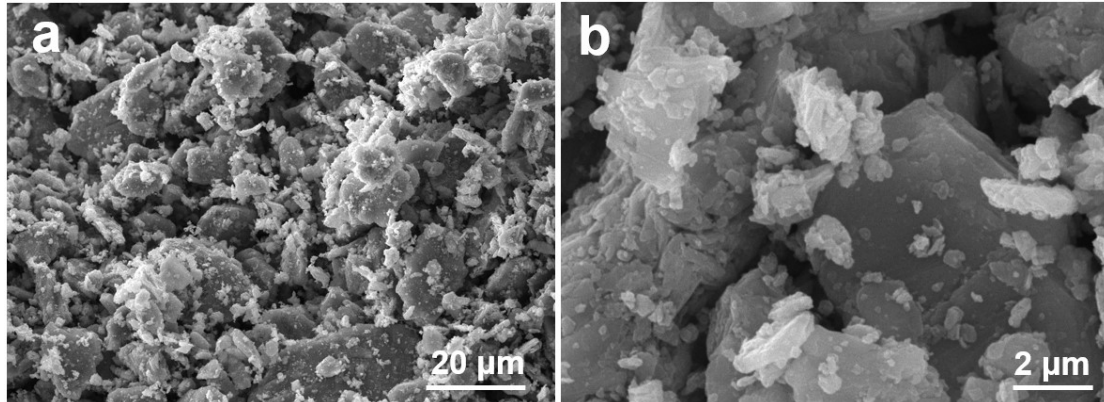

Fig. S1. SEM images of the  $\text{Ti}_3\text{AlC}_2$  MAX phase.

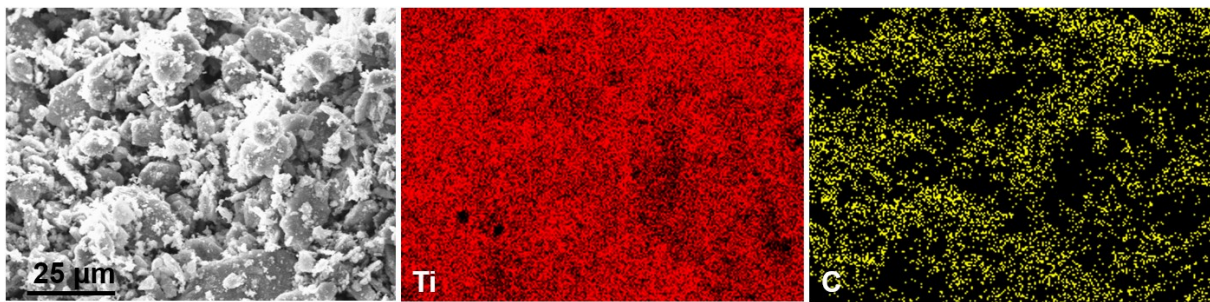

Fig. S2. Mapping images of the  $\text{Ti}_3\text{AlC}_2$  MAX phase.

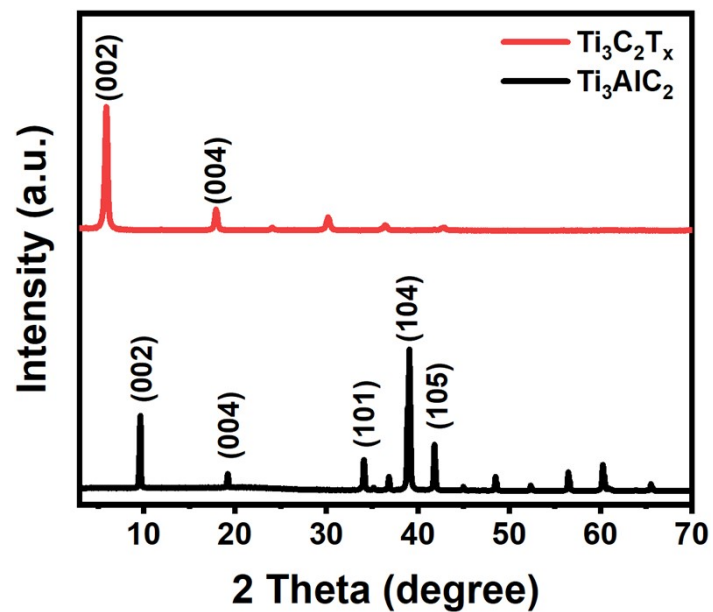

Fig. S3. XRD patterns of the  $\text{Ti}_3\text{AlC}_2$  MAX and  $\text{Ti}_3\text{C}_2\text{T}_x$ .

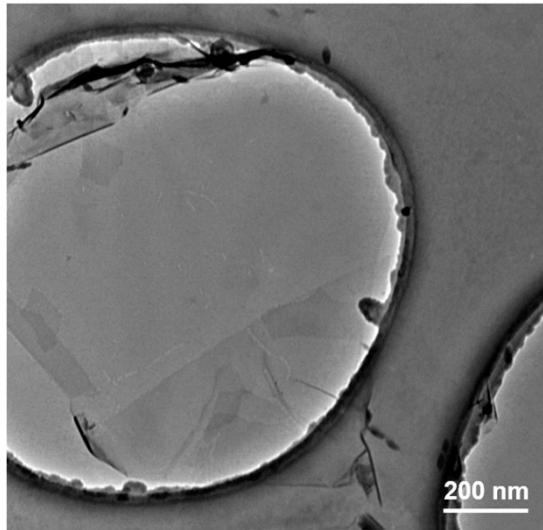

**Fig. S4.** TEM images of the  $\text{Ti}_3\text{C}_2\text{T}_x$  nanosheets.

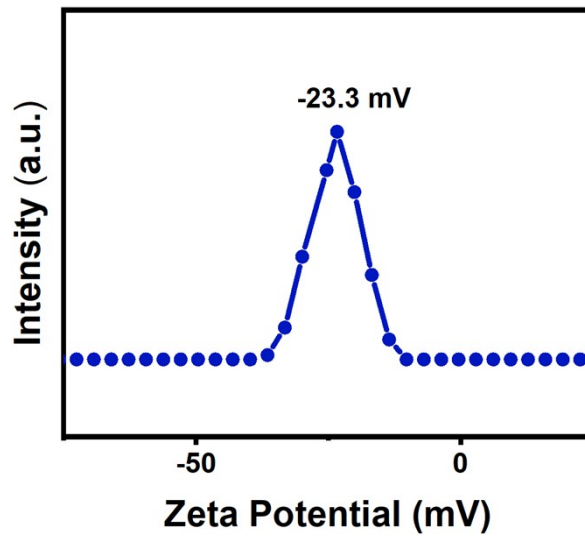

**Fig. S5.** Zeta potentials of the  $\text{Ti}_3\text{C}_2\text{T}_x$  MXene solution.

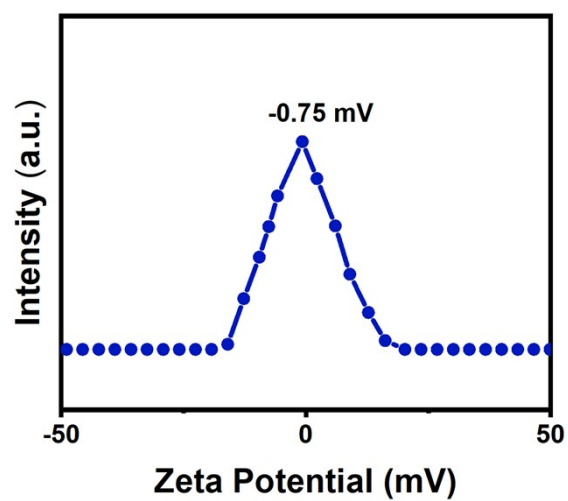

**Fig. S6.** Zeta potentials of the PANI/MXene solution.

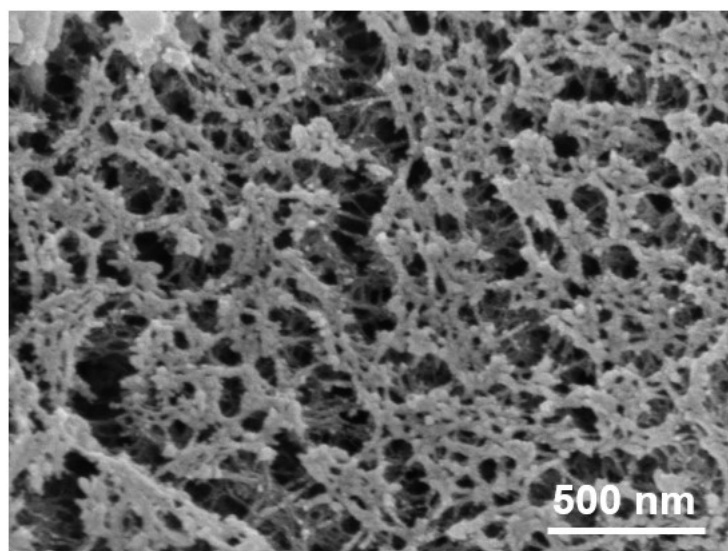

**Fig. S7.** SEM images of the PANI/MXene.

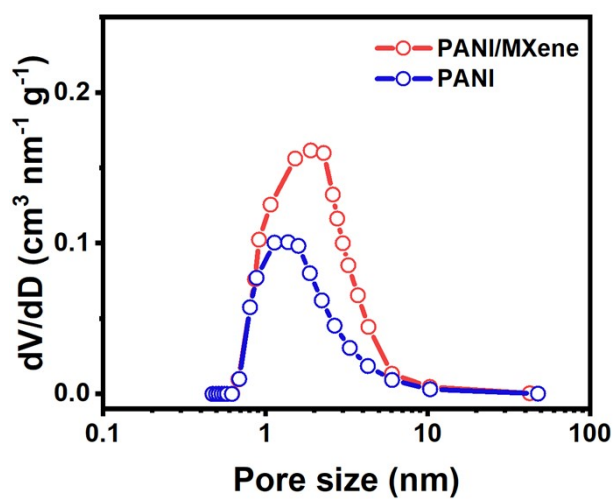

**Fig. S8.** The pore size distribution of the PANI/MXene and PANI cathode.

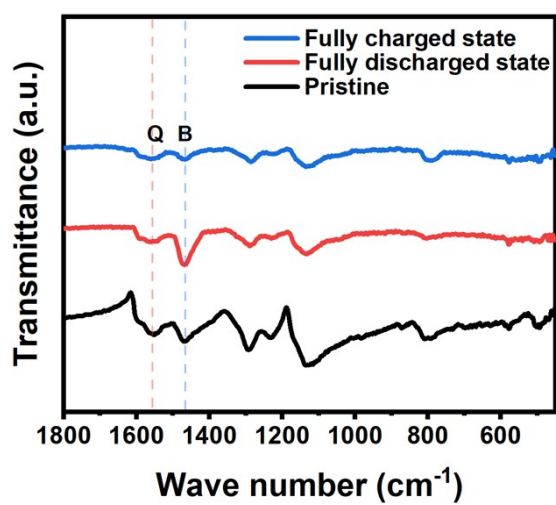

**Fig. S9.** The FTIR spectra in pristine, fully discharged, and fully charged states.

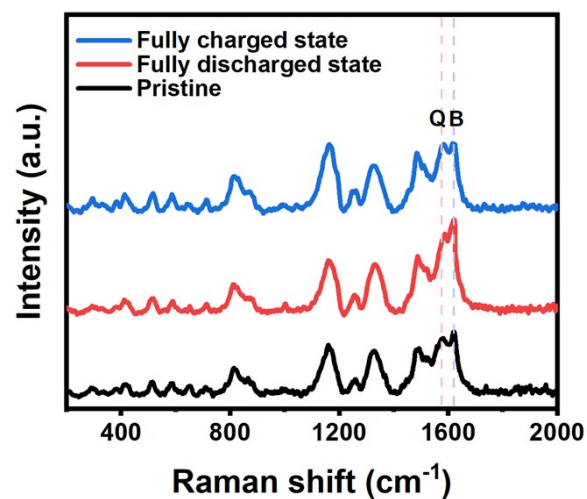

**Fig. S10.** The Raman spectra in pristine, fully discharged, and fully charged states.

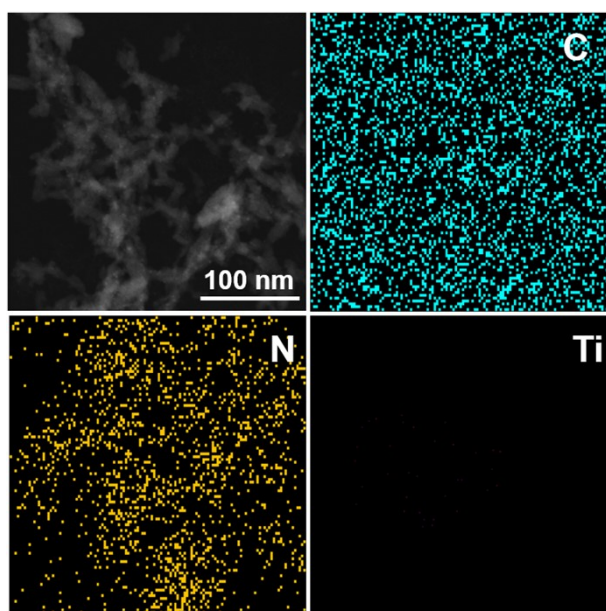

**Fig. S11.** STEM and the corresponding elemental mapping images of the PANI.

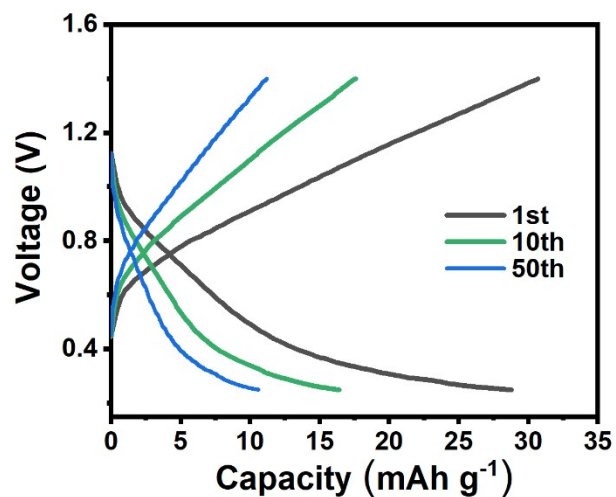

**Fig. S12.** Charge/discharge curves of MXene nanosheets at  $0.2 \text{ A g}^{-1}$ .

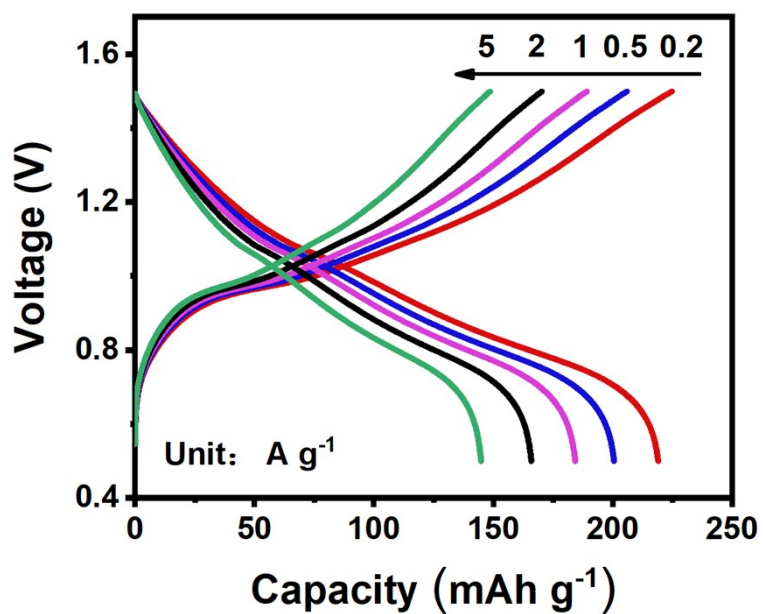

**Fig. S13.** Charge/discharge curves of the PANI/MXene at different current densities.



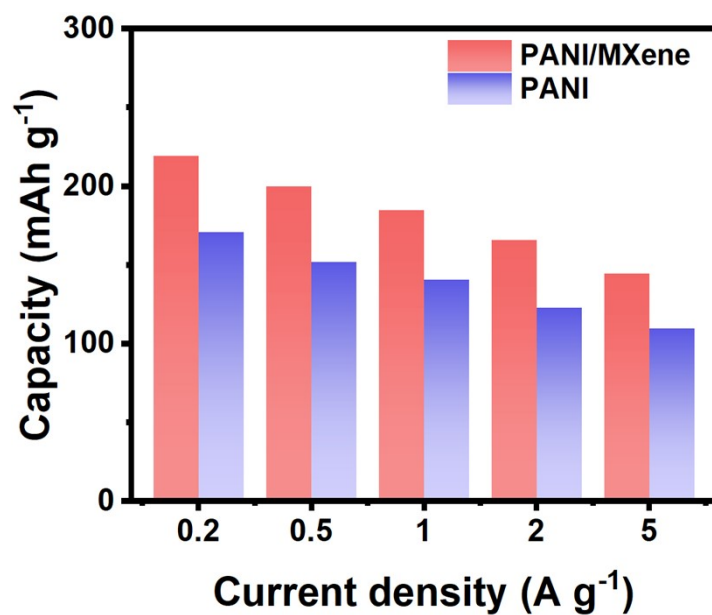

Fig. S14. The average capacities of the PANI/MXene and PANI.

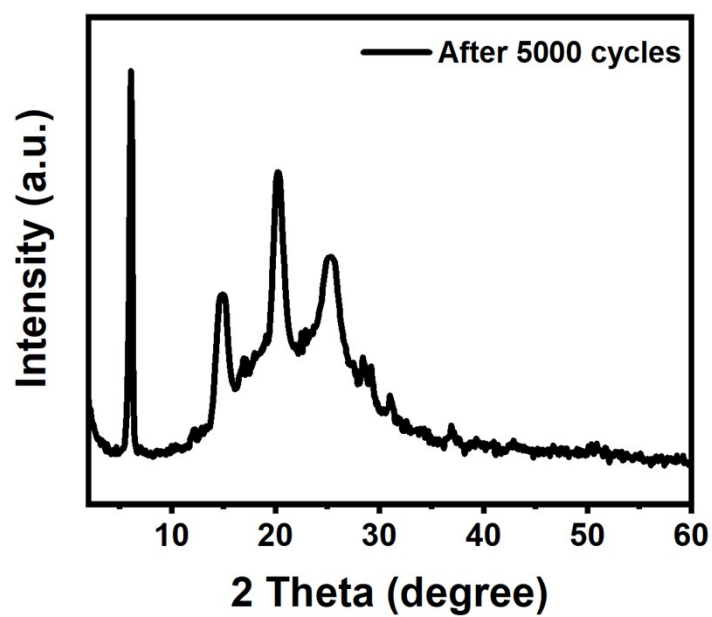

Fig. S15. The XRD pattern of the PANI/MXene after 5000 cycles.



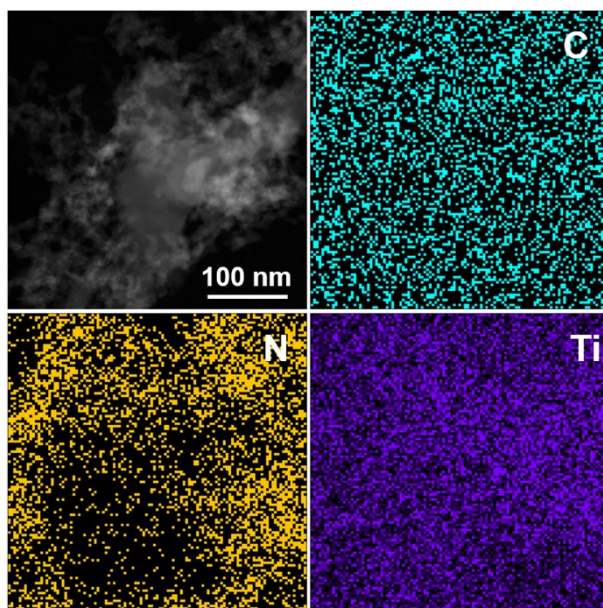

**Fig. S16.** STEM and the corresponding elemental mapping images of the PANI/MXene after 5000 cycles.

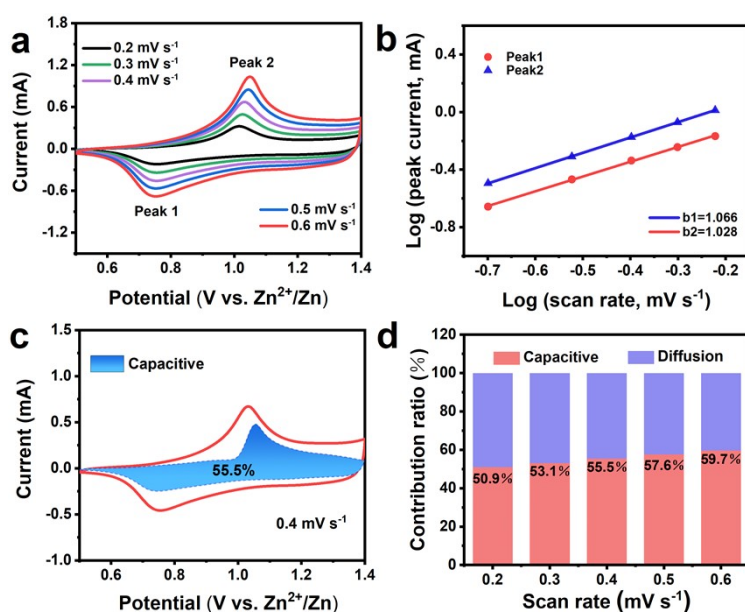

**Fig. S17** The electrochemical kinetics of the PANI cathode. a) CV curves at various scan rates. b)  $\log v$  vs.  $\log i$  plots according to the CV curves. c) The CV curve with a capacitive contribution at  $0.4 \text{ mV s}^{-1}$ . d) The capacitive contribution ratios at various scan rates.

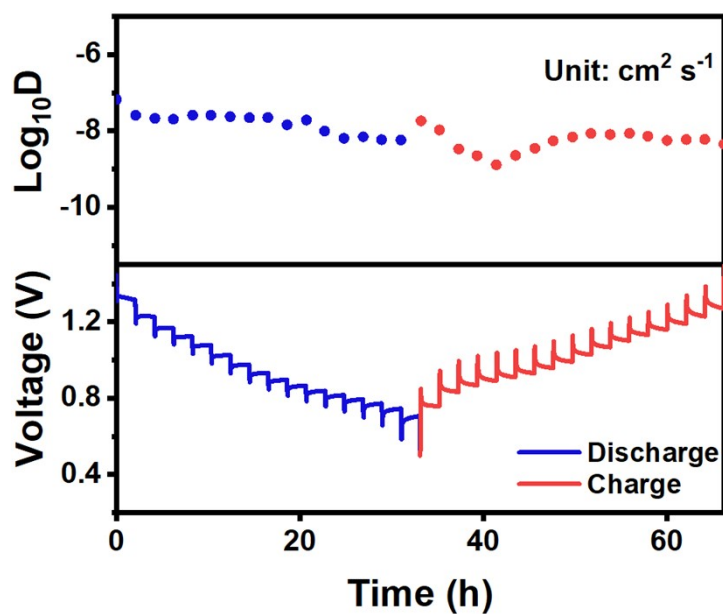

Fig. S18. GITT curves of the PANI/MXene and the corresponding ion diffusion coefficients.

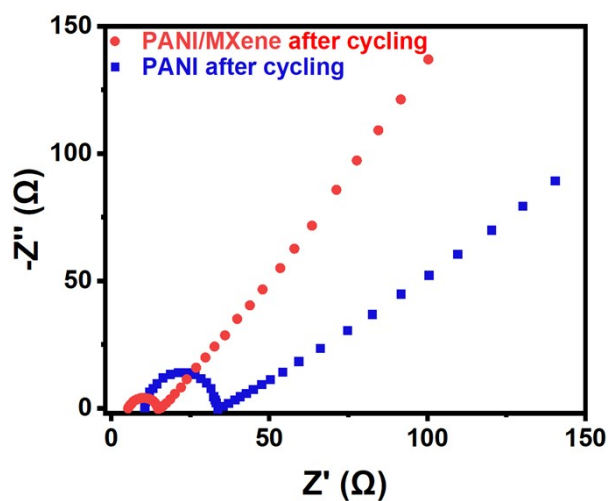

Fig. S19. Nyquist plots of the PANI/MXene and PANI after 5000 cycles.

**Table S1.** Comparisons of the electrochemical performance of PANI/MXene with other PANI-based electrodes.

| Cathode material  | Mass loading (mg cm <sup>-2</sup> ) | Capacity (mAh/g) | Capacity retention (%)  | Ref.      |
|-------------------|-------------------------------------|------------------|-------------------------|-----------|
| PANI/MXene        | 1.5                                 | 147.4 (5 A/g)    | 88.3 %<br>(5000 cycles) | This work |
| PANI/carbon felts | 1.5                                 | 89.1 (5 A/g)     | 92.0 %<br>(3000 cycles) | [S1]      |
| PANI-S            | 1.2                                 | 130.1 (10 A/g)   | 84.6 %<br>(2000 cycles) | [S2]      |
| PANI/SWCNTs film  | 1.5                                 | 135.8 (1 A/g)    | 97.3 %<br>(1000 cycles) | [S3]      |
| PANI-SWCNT-sponge | 3.0                                 | 115 (1 A/g)      | 94.0 %<br>(500 cycles)  | [S4]      |
| OCF/PANI          | 2.4                                 | 119.4 (0.1 A/g)  | 95.4 %<br>(200 cycles)  | [S5]      |
| PANI@CNT          | –                                   | 107.6 (0.5 A/g)  | 91.1 %<br>(150 cycles)  | [S6]      |
| ZnHCF/PANI        | 1.5                                 | 85.0 (0.5 A/g)   | 75.0 %<br>(350 cycles)  | [S7]      |
| KCY@PANI          | 0.83                                | 141.9 (2 A/g)    | 88.0 %<br>(2000 cycles) | [S8]      |

[S1] F. Wan, L. Zhang, X. Wang, S. Bi, Z. Niu and J. Chen, *Adv. Funct. Mater.*, 2018, **28**, 1804975.

[S2] H. Y. Shi, Y. J. Ye, K. Liu, Y. Song and X. Sun, *Angew. Chem. Int. Ed.*, 2018, **57**, 16359-16363.

[S3] M. Yao, Z. Yuan, S. Li, T. He, R. Wang, M. Yuan and Z. Niu, *Adv. Mater.*, 2021, **33**, 2008140.

[S4] H. Cao, F. Wan, L. Zhang, X. Dai, S. Huang, L. Liu and Z. Niu, *J. Mater. Chem. A*, 2019, **7**, 11734-11741.

[S5] H. Yu, G. Liu, M. Wang, R. Ren, G. Shim, J. Y. Kim, M. X. Tran, D. Byun and J. K. Lee, *ACS Appl Mater Interfaces*, 2020, **12**, 5820-5830.

[S6] X. Xiao, W. Liu, K. Wang, C. Li, X. Sun, X. Zhang, W. Liu and Y. Ma, *Nanoscale Adv.*, 2020, **2**, 296-303.

[S7] Q. Liu, Z. Ma, Z. Chen, M. Cui, H. Lei, J. Wang, J. Fei, N. He, Y. Liu, Q. Liu, W. Li and Y. Huang, *Chem. Commun.*, 2022, **58**, 8226-8229.

[S8] G. Shim, M. X. Tran, G. Liu, D. Byun and J. K. Lee, *Energy Storage Mater.*, 2021, **35**, 739-749.
